# Supplementary material for: High Fructose Intake Contributes to Elevated Diastolic Blood Pressure in Adolescent Girls: Results from The HELENA Study
Source: MDPI journal article supplement (doi:10.3390/nu13103608), 2021-10-15
Supplement: s1 [file s1]

### Supplementary Materials

**Table S1 :** Pure fructose and fructose total exposure intake content in various fructose-containing foods.

| Dietary sources of fructose<br>according to Mesana <i>et al</i> 2016 (39) | Pure<br>Fructose<br><br>(per 100 g of food) | Fructose total ex-<br>posure*<br><br>(per 100 g of food) | Reference              |
|---------------------------------------------------------------------------|---------------------------------------------|----------------------------------------------------------|------------------------|
| Sugar-sweetened beverages                                                 | 4.9                                         | 5.4                                                      | Walker et al 2014 [44] |
| Non-chocolate confectionary                                               | 2.6                                         | 22.6                                                     | Walker et al 2015 [45] |
| Chocolate                                                                 | 8.5                                         | 9.5                                                      | Sluik et al 2015 [46]  |
| Cakes/pies/biscuits                                                       | 3.5                                         | 15.8                                                     | Walker et al 2015 [45] |
| Desserts and puddings                                                     | 2.1                                         | 5.1                                                      | Walker et al 2015 [45] |
| Breakfast cereals                                                         | 1.2                                         | 11.4                                                     | Walker et al 2015 [45] |
| Others sources                                                            | 2.7                                         | 2.7                                                      | Walker et al 2015 [45] |
| Fruit and vegetables juices                                               | 4.3                                         | 4.9                                                      | Walker et al 2015 [45] |
| Honey/Jam/Syrup                                                           | 40.9                                        | 50.4                                                     | Raatz et al 2015 [47]  |
| Fruits                                                                    | 7.0                                         | 8.5                                                      | Sluik et al 2015 [46]  |

\*Fructose total exposure = Pure fructose (monosaccharide form) + fructose from sucrose ( $0.5 \times$  sucrose per 100g)

**Table S2.** Data of confounding factors according to fructose exposure

|                        | Pure fructose |             |             | Total fructose exposure |             |             |
|------------------------|---------------|-------------|-------------|-------------------------|-------------|-------------|
|                        | Low           | Middle      | High        | Low                     | Middle      | High        |
| Number of adolescents  | 542           | 584         | 579         | 542                     | 582         | 581         |
| Gender (%boys)         | 33.0          | 44.4        | 63.2        | 33.4                    | 43.3        | 63.9        |
| Age (years)            | 14.6 ± 1.2    | 14.8 ± 1.2  | 14.9 ± 1.3  | 14.6 ± 1.2              | 14.7 ± 1.2  | 14.9 ± 1.3  |
| Height (cm)            | 163.8 ± 8.3   | 165.7 ± 9.4 | 168.0 ± 9.0 | 163.3 ± 8.4             | 165.8 ± 9.0 | 168.3 ± 9.2 |
| Body mass (kg)         | 56.5 ± 11.3   | 56.1 ± 11.6 | 58.3 ± 11.6 | 55.8 ± 10.6             | 56.6 ± 12.3 | 58.4 ± 11.5 |
| Z-score BMI            | 0.28 ± 0.93   | 0.10 ± 0.85 | 0.14 ± 0.89 | 0.26 ± 0.91             | 0.13 ± 0.88 | 0.13 ± 0.88 |
| MVPA (min/d)           | 47.6 ± 22.6   | 53.5 ± 26.7 | 61.0 ± 29.8 | 47.6 ± 22.7             | 53.1 ± 26.9 | 61.2 ± 29.4 |
| Tobacco intake (%)     | 12.7          | 14.7        | 18.7        | 13.0                    | 13.9        | 19.2        |
| Salt intake (mg/d)     | 2309.8        | 2407.8      | 2684.2      | 2308.2                  | 2410.       | 2682.       |
|                        | ± 728.2       | ± 876.2     | ± 905.0     | ± 732.0                 | ± 872.4     | ± 906.1     |
| Energy intake (kcal/d) | 2143.4        | 2366.4      | 2827.8      | 2120.3                  | 2363        | 2850.4      |
|                        | ± 445.6       | ± 496.1     | ± 711.3     | ± 416.3                 | ± 498.7     | ± 702.6     |

Mean ± SD

**Table S3.** Comparison of main characteristics between the included and non-included adolescents

|                       | Included    | Not included | P-value | Absolute standardized difference (%) |
|-----------------------|-------------|--------------|---------|--------------------------------------|
| Number of adolescents | 1705        | 2024         |         |                                      |
| Gender (%boys)        | 52.8        | 51.8         | 0.53    | 4.3                                  |
| Age (years)           | 14.7 ± 1.2  | 14.7 ± 1.2   | 0.48    | 9.0                                  |
| Height (cm)           | 165.9 ± 9.1 | 165.8 ± 9.2  | 0.77    | 7.6                                  |
| Body mass (kg)        | 57.0 ± 11.5 | 61.1 ± 13.4  | <0.001  | 26.6                                 |
| Z-score BMI           | 0.17 ± 0.89 | 0.56 ± 0.93  | <0.001  | 35.6                                 |

Mean ± SD
